# Supplementary material for: Prognosis Value of Immunoregulatory Molecules in Oral Cancer Microenvironment: An Immunohistochemical Study
Source: MDPI journal article supplement (doi:10.3390/biomedicines10030710), 2022-03-19
Supplement: s1 [file s1]

SUPPLEMENTARY INFORMATION

Supplementary Figure S1. Flow chart of the selected sample.

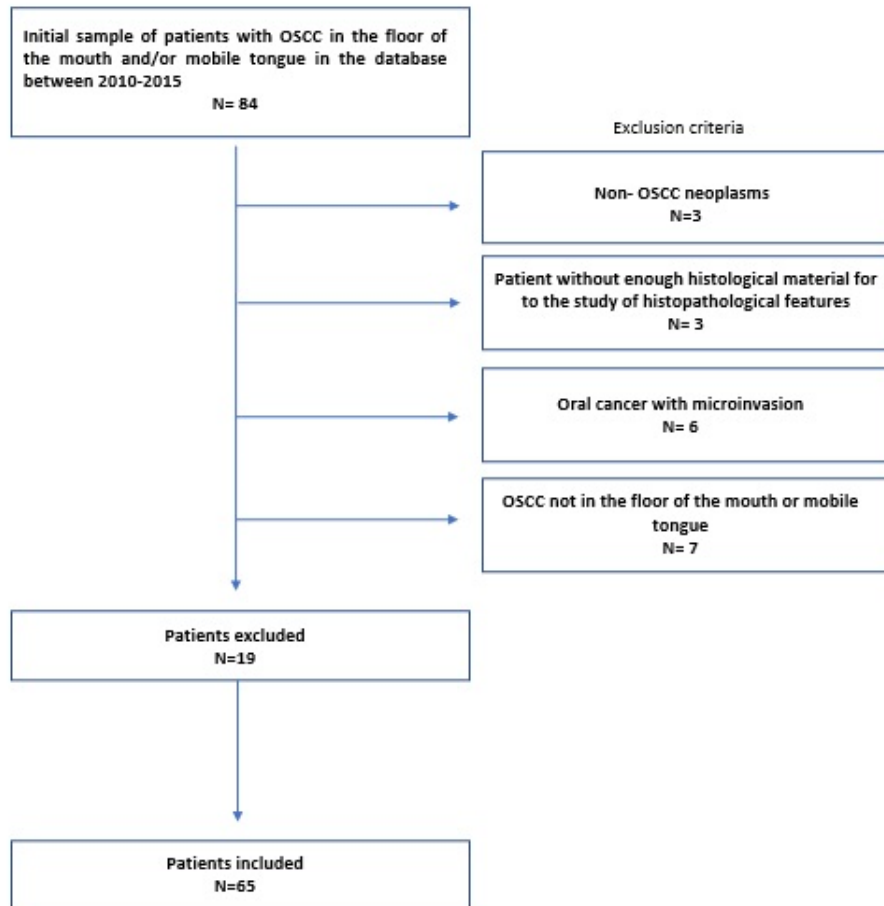

Supplementary Table S1. Descriptive statistics of biomarkers according to sex.

| Variable                 | N  | Overall, N = 65   | Sex               |                   | p-value <sup>1</sup> |
|--------------------------|----|-------------------|-------------------|-------------------|----------------------|
|                          |    |                   | Men, N = 40       | Women, N = 25     |                      |
| PD-1                     | 65 |                   |                   |                   | 0.838                |
| Median (IQR)             |    | 0.01 (0.00, 0.05) | 0.02 (0.00, 0.05) | 0.01 (0.00, 0.03) |                      |
| PD-1                     | 65 |                   |                   |                   | 0.202                |
| PD-1-Negative <0%        |    | 13 (20%)          | 10 (25%)          | 3 (12%)           |                      |
| PD-1-Positive >0%        |    | 52 (80%)          | 30 (75%)          | 22 (88%)          |                      |
| PD-L1 CPS                | 65 |                   |                   |                   | 0.138                |
| Median (IQR)             |    | 2 (0, 15)         | 1 (0, 6)          | 3 (1, 22)         |                      |
| PD-L1 CPS                | 65 |                   |                   |                   | 0.279                |
| cps[0,1)                 |    | 26 (40%)          | 15 (38%)          | 11 (44%)          |                      |
| cps[1,20)                |    | 16 (25%)          | 8 (20%)           | 8 (32%)           |                      |
| cps[20,100]              |    | 23 (35%)          | 17 (42%)          | 6 (24%)           |                      |
| PD-L1 CPS cutoff >1      | 65 |                   |                   |                   | 0.194                |
| PD-L1 Negative CPS<=1    |    | 30 (46%)          | 21 (52%)          | 9 (36%)           |                      |
| PD-L1 Positive CPS>1     |    | 35 (54%)          | 19 (48%)          | 16 (64%)          |                      |
| PD-L1 intensity          | 65 |                   |                   |                   | 0.250                |
| Nil                      |    | 25 (38%)          | 19 (48%)          | 6 (24%)           |                      |
| Low                      |    | 18 (28%)          | 10 (25%)          | 8 (32%)           |                      |
| Moderate                 |    | 18 (28%)          | 9 (22%)           | 9 (36%)           |                      |
| Intense                  |    | 4 (6.2%)          | 2 (5.0%)          | 2 (8.0%)          |                      |
| PD-L1 TPS                | 65 |                   |                   |                   | 0.037                |
| Median (IQR)             |    | 0 (0, 19)         | 0 (0, 4)          | 1 (0, 40)         |                      |
| PD-L1 TPS cutoffs 5%/10% | 65 |                   |                   |                   | 0.131                |
| PD-L1 <5%                |    | 43 (66%)          | 30 (75%)          | 13 (52%)          |                      |
| PD-L1 [5-10%)            |    | 4 (6.2%)          | 2 (5.0%)          | 2 (8.0%)          |                      |
| PD-L1[10-100%]           |    | 18 (28%)          | 8 (20%)           | 10 (40%)          |                      |
| PD-L1 TPS cutoff 5%      | 65 |                   |                   |                   | 0.057                |
| PD-L1 TPS<5%             |    | 43 (66%)          | 30 (75%)          | 13 (52%)          |                      |
| PD-L1 TPS>=5%            |    | 22 (34%)          | 10 (25%)          | 12 (48%)          |                      |
| PD-L1 TPS cutoff 10%     | 65 |                   |                   |                   | 0.153                |
| PD-L1 TPS <=10%          |    | 48 (74%)          | 32 (80%)          | 16 (64%)          |                      |
| PD-L1 TPS >10%           |    | 17 (26%)          | 8 (20%)           | 9 (36%)           |                      |
| FOXP3 (%)                | 65 |                   |                   |                   | 0.073                |
| Median (IQR)             |    | 15 (10, 20)       | 10 (7, 16)        | 15 (10, 20)       |                      |
| FOXP3 cutoff 10%         | 65 |                   |                   |                   | 0.033                |
| [0-10)%                  |    | 29 (45%)          | 22 (55%)          | 7 (28%)           |                      |
| (10-100)%                |    | 36 (55%)          | 18 (45%)          | 18 (72%)          |                      |
| CD4 (%)                  | 65 |                   |                   |                   | 0.223                |
| Median (IQR)             |    | 25 (15, 35)       | 20 (15, 31)       | 30 (20, 35)       |                      |
| CD4                      | 65 |                   |                   |                   | 0.126                |
| [0.05,0.25)              |    | 31 (48%)          | 23 (57%)          | 8 (32%)           |                      |
| [0.25,0.35)              |    | 13 (20%)          | 7 (18%)           | 6 (24%)           |                      |
| [0.35,0.50]              |    | 21 (32%)          | 10 (25%)          | 11 (44%)          |                      |
| P16                      | 65 |                   |                   |                   | >0.999               |
| Negative                 |    | 63 (97%)          | 39 (98%)          | 24 (96%)          |                      |
| Positive                 |    | 2 (3.1%)          | 1 (2.5%)          | 1 (4.0%)          |                      |
| CSF1R (%)                | 65 |                   |                   |                   | 0.619                |
| Median (IQR)             |    | 7 (3, 10)         | 7 (3, 10)         | 7 (3, 10)         |                      |
| CSF1R                    | 65 |                   |                   |                   | 0.217                |
| [0-8%)                   |    | 38 (58%)          | 21 (52%)          | 17 (68%)          |                      |
| [8-100]                  |    | 27 (42%)          | 19 (48%)          | 8 (32%)           |                      |
| CD8 (%)                  | 65 |                   |                   |                   | 0.644                |

Supplementary Table S1. Descriptive statistics of biomarkers according to sex.

| Variable              | N  | Overall, N = 65 | Sex         |               | p-value <sup>1</sup> |
|-----------------------|----|-----------------|-------------|---------------|----------------------|
|                       |    |                 | Men, N = 40 | Women, N = 25 |                      |
| Median (IQR)          |    | 30 (20, 40)     | 32 (20, 41) | 30 (25, 35)   |                      |
| CD8                   | 65 |                 |             |               | 0.099                |
| CD8 [0-10%] Mild      |    | 5 (7.7%)        | 4 (10%)     | 1 (4.0%)      |                      |
| CD8 [10-50%] Moderate |    | 51 (78%)        | 28 (70%)    | 23 (92%)      |                      |
| CD8 >=50% Severe      |    | 9 (14%)         | 8 (20%)     | 1 (4.0%)      |                      |

<sup>1</sup>Wilcoxon rank sum test; Pearson's Chi-squared test; Fisher's exact test

Abbreviations: IQR: interquartile range.

Supplementary Table S2. Bivariate correlation between biomarkers Spearman's rank-order correlation

| Parameter 1 | Parameter 2 | rho (CI95%)           | <i>p</i> -value |
|-------------|-------------|-----------------------|-----------------|
| PD-1        | PD-L1       | 0.251 (0.001-0.472)   | 0.737           |
| PD-1        | FOXP3       | 0.065 (-0.189-0.311)  | 1.000           |
| PD-1        | CSF1R       | 0.079 (-0.175-0.324)  | 1.000           |
| PD-1        | CD4         | 0.092 (-0.163-0.335)  | 1.000           |
| PD-1        | CD8         | -0.080 (-0.325-0.174) | 1.000           |
| PD-L1       | FOXP3       | 0.038 (-0.215-0.286)  | 1.000           |
| PD-L1       | CSF1R       | 0.283 (0.034-0.498)   | 0.452           |
| PD-L1       | CD4         | -0.160 (-0.395-0.094) | 1.000           |
| PD-L1       | CD8         | 0.018 (-0.234-0.268)  | 1.000           |
| FOXP3       | CSF1R       | 0.196 (-0.058-0.426)  | 1.000           |
| FOXP3       | CD4         | 0.341 (0.099-0.545)   | 0.114           |
| FOXP3       | CD8         | 0.049 (-0.204-0.296)  | 1.000           |
| CSF1R       | CD4         | 0.014 (-0.238-0.264)  | 1.000           |
| CSF1R       | CD8         | 0.016 (-0.236-0.266)  | 1.000           |
| CD4         | CD8         | 0.243 (-0.008-0.465)  | 0.818           |

Abbreviations: CI: Confidence Interval.

Supplementary Table S3. Descriptive statistics of clinical and histopathological variables according to PD-1 expression and PD-L1 expression in TPS and CPS.

| Variable                             | N  | Overall, N = 65 | PD-1 Expression    |                      | p-value <sup>1</sup> | PD-L1 Expression TPS |             |                      | PD-L1 Expression CPS |             | p-value <sup>1</sup> |
|--------------------------------------|----|-----------------|--------------------|----------------------|----------------------|----------------------|-------------|----------------------|----------------------|-------------|----------------------|
|                                      |    |                 | Negative, <0% = 13 | Positive, >0% N = 52 |                      | TPS <5%              | TPS ≥5%     | p-value <sup>1</sup> | CPS ≤ 1              | CPS > 1     |                      |
| Sex                                  | 65 |                 |                    |                      | 0.202                |                      |             | 0.057                |                      |             | 0.194                |
| Men                                  |    | 40 (62%)        | 10 (77%)           | 30 (58%)             |                      | 30 (70%)             | 10 (45%)    |                      | 21 (70%)             | 19 (54%)    |                      |
| Women                                |    | 25 (38%)        | 3 (23%)            | 22 (42%)             |                      | 13 (30%)             | 12 (55%)    |                      | 9 (30%)              | 16 (46%)    |                      |
| Age at diagnosis                     | 65 |                 |                    |                      | 0.254                |                      |             | 0.598                |                      |             | 0.171                |
| Mean (SD)                            |    | 67 (57, 73)     | 65 (56, 68)        | 68 (59, 75)          |                      | 66 (56, 73)          | 68 (59, 76) | 0.598                | 66 (55, 71)          | 69 (60, 74) |                      |
| Tobacco use                          | 63 |                 |                    |                      | 0.539                |                      |             | 0.405                |                      |             | 0.249                |
| Never smoker                         |    | 30 (48%)        | 4 (33%)            | 26 (51%)             |                      | 18 (42%)             | 12 (60%)    |                      | 12 (40%)             | 18 (55%)    |                      |
| Former smoker                        |    | 16 (25%)        | 4 (33%)            | 12 (24%)             |                      | 12 (28%)             | 4 (20%)     |                      | 7 (23%)              | 9 (27%)     |                      |
| Current smoker                       |    | 17 (27%)        | 4 (33%)            | 13 (25%)             |                      | 13 (30%)             | 4 (20%)     |                      | 11 (37%)             | 6 (18%)     |                      |
| Alcohol use                          | 60 |                 |                    |                      | 0.685                |                      |             | 0.910                |                      |             | >0.999               |
| Nondrinker                           |    | 41 (68%)        | 7 (58%)            | 34 (71%)             |                      | 27 (66%)             | 14 (74%)    |                      | 20 (69%)             | 21 (68%)    |                      |
| Former drinker                       |    | 7 (12%)         | 2 (17%)            | 5 (10%)              |                      | 5 (12%)              | 2 (11%)     |                      | 3 (10%)              | 4 (13%)     |                      |
| Current drinker                      |    | 12 (20%)        | 3 (25%)            | 9 (19%)              |                      | 9 (22%)              | 3 (16%)     |                      | 6 (21%)              | 6 (19%)     |                      |
| Mouth Primary Location               | 65 | 23 (35%)        | 5 (38%)            | 18 (35%)             | >0.999               | 18 (42%)             | 5 (23%)     | 0.127                | 17 (57%)             | 6 (17%)     | <0.001               |
| Tongue Primary Location              | 65 | 48 (74%)        | 11 (85%)           | 37 (71%)             | 0.486                | 30 (70%)             | 18 (82%)    | 0.296                | 18 (60%)             | 30 (86%)    | 0.019                |
| Tumor Size status                    | 63 |                 |                    |                      | 0.157                |                      |             | 0.518                |                      |             | 0.633                |
| T1                                   |    | 13 (21%)        | 2 (17%)            | 11 (22%)             |                      | 10 (24%)             | 3 (14%)     |                      | 5 (17%)              | 8 (24%)     |                      |
| T2                                   |    | 25 (40%)        | 2 (17%)            | 23 (45%)             |                      | 14 (33%)             | 11 (52%)    |                      | 10 (34%)             | 15 (44%)    |                      |
| T3                                   |    | 13 (21%)        | 4 (33%)            | 9 (18%)              |                      | 10 (24%)             | 3 (14%)     |                      | 7 (24%)              | 6 (18%)     |                      |
| T4                                   |    | 12 (19%)        | 4 (33%)            | 8 (16%)              |                      | 8 (19%)              | 4 (19%)     |                      | 7 (24%)              | 5 (15%)     |                      |
| Nodal status                         | 60 |                 |                    |                      | 0.200                |                      |             | 0.143                |                      |             | 0.756                |
| N0                                   |    | 36 (60%)        | 5 (45%)            | 31 (63%)             |                      | 27 (68%)             | 9 (45%)     |                      | 16 (59%)             | 20 (61%)    |                      |
| N1                                   |    | 8 (13%)         | 3 (27%)            | 5 (10%)              |                      | 5 (12%)              | 3 (15%)     |                      | 4 (15%)              | 4 (12%)     |                      |
| N2                                   |    | 14 (23%)        | 2 (18%)            | 12 (24%)             |                      | 8 (20%)              | 6 (30%)     |                      | 7 (26%)              | 7 (21%)     |                      |
| N3                                   |    | 2 (3.3%)        | 1 (9.1%)           | 1 (2.0%)             |                      | 0 (0%)               | 2 (10%)     |                      | 0 (0%)               | 2 (6.1%)    |                      |
| Metastasis status                    | 60 |                 |                    |                      | 0.330                |                      |             | 0.404                |                      |             | 0.222                |
| M0                                   |    | 53 (88%)        | 8 (80%)            | 45 (90%)             |                      | 33 (85%)             | 20 (95%)    |                      | 21 (81%)             | 32 (94%)    |                      |
| M1                                   |    | 7 (12%)         | 2 (20%)            | 5 (10%)              |                      | 6 (15%)              | 1 (4.8%)    |                      | 5 (19%)              | 2 (5.9%)    |                      |
| Stage                                | 63 |                 |                    |                      | 0.574                |                      |             | 0.612                |                      |             | 0.680                |
| Stage I                              |    | 8 (13%)         | 1 (8.3%)           | 7 (14%)              |                      | 7 (17%)              | 1 (4.8%)    |                      | 4 (14%)              | 4 (12%)     |                      |
| Stage II                             |    | 13 (21%)        | 3 (25%)            | 10 (20%)             |                      | 9 (21%)              | 4 (19%)     |                      | 5 (17%)              | 8 (24%)     |                      |
| Stage III                            |    | 28 (44%)        | 7 (58%)            | 21 (41%)             |                      | 17 (40%)             | 11 (52%)    |                      | 15 (52%)             | 13 (38%)    |                      |
| Stage IV                             |    | 14 (22%)        | 1 (8.3%)           | 13 (25%)             |                      | 9 (21%)              | 5 (24%)     |                      | 5 (17%)              | 9 (26%)     |                      |
| Histological Grade                   | 65 |                 |                    |                      | 0.478                |                      |             | 0.239                |                      |             | 0.456                |
| Grade 1: WD                          |    | 22 (34%)        | 4 (31%)            | 18 (35%)             |                      | 17 (40%)             | 5 (23%)     |                      | 11 (37%)             | 11 (31%)    |                      |
| Grade 2: MD                          |    | 37 (57%)        | 9 (69%)            | 28 (54%)             |                      | 21 (49%)             | 16 (73%)    |                      | 15 (50%)             | 22 (63%)    |                      |
| Grade 3: PD                          |    | 6 (9.2%)        | 0 (0%)             | 6 (12%)              |                      | 5 (12%)              | 1 (4.5%)    |                      | 4 (13%)              | 2 (5.7%)    |                      |
| Oral potentially malignant disorders | 65 | 10 (15%)        | 0 (0%)             | 10 (19%)             | 0.191                | 7 (16%)              | 3 (14%)     | >0.999               | 6 (20%)              | 4 (11%)     | 0.493                |
| Lymphoplasmacytic invasion           | 65 |                 |                    |                      | 0.030                |                      |             | 0.647                |                      |             | 0.731                |
| Nil                                  |    | 2 (3.1%)        | 0 (0%)             | 2 (3.8%)             |                      | 2 (4.7%)             | 0 (0%)      |                      | 1 (3.3%)             | 1 (2.9%)    |                      |
| Low                                  |    | 33 (51%)        | 11 (85%)           | 22 (42%)             |                      | 20 (47%)             | 13 (59%)    |                      | 15 (50%)             | 18 (51%)    |                      |
| Moderate                             |    | 25 (38%)        | 1 (7.7%)           | 24 (46%)             |                      | 18 (42%)             | 7 (32%)     |                      | 13 (43%)             | 12 (34%)    |                      |
| Intense                              |    | 5 (7.7%)        | 1 (7.7%)           | 4 (7.7%)             |                      | 3 (7.0%)             | 2 (9.1%)    |                      | 1 (3.3%)             | 4 (11%)     |                      |
| Vascular invasion                    | 65 | 5 (7.7%)        | 1 (7.7%)           | 4 (7.7%)             | >0.999               | 3 (7.0%)             | 2 (9.1%)    | >0.999               | 3 (10%)              | 2 (5.7%)    | 0.655                |
| Perineural invasion                  | 65 | 26 (40%)        | 7 (54%)            | 19 (37%)             | 0.255                | 19 (44%)             | 7 (32%)     | 0.335                | 14 (47%)             | 12 (34%)    | 0.310                |
| WPOI                                 | 65 |                 |                    |                      | 0.313                |                      |             | 0.102                |                      |             | 0.016                |
| WPOI 1                               |    | 4 (6.2%)        | 1 (7.7%)           | 3 (5.8%)             |                      | 4 (9.3%)             | 0 (0%)      |                      | 4 (13%)              | 0 (0%)      |                      |
| WPOI 2                               |    | 30 (46%)        | 4 (31%)            | 26 (50%)             |                      | 17 (40%)             | 13 (59%)    |                      | 10 (33%)             | 20 (57%)    |                      |
| WPOI 3                               |    | 20 (31%)        | 7 (54%)            | 13 (25%)             |                      | 13 (30%)             | 7 (32%)     |                      | 8 (27%)              | 12 (34%)    |                      |
| WPOI 4                               |    | 4 (6.2%)        | 0 (0%)             | 4 (7.7%)             |                      | 2 (4.7%)             | 2 (9.1%)    |                      | 2 (6.7%)             | 2 (5.7%)    |                      |
| WPOI 5                               |    | 7 (11%)         | 1 (7.7%)           | 6 (12%)              |                      | 7 (16%)              | 0 (0%)      |                      | 6 (20%)              | 1 (2.9%)    |                      |
| Risk Score                           | 65 |                 |                    |                      | 0.165                |                      |             | 0.229                |                      |             | 0.043                |
| 0-1                                  |    | 24 (37%)        | 2 (15%)            | 22 (42%)             |                      | 17 (40%)             | 7 (32%)     |                      | 12 (40%)             | 12 (34%)    |                      |
| 2-3                                  |    | 18 (28%)        | 4 (31%)            | 14 (27%)             |                      | 9 (21%)              | 9 (41%)     |                      | 4 (13%)              | 14 (40%)    |                      |
| 4-7                                  |    | 23 (35%)        | 7 (54%)            | 16 (31%)             |                      | 17 (40%)             | 6 (27%)     |                      | 14 (47%)             | 9 (26%)     |                      |
| Depth of invasion                    | 63 |                 |                    |                      | 0.017                |                      |             | 0.170                |                      |             | 0.978                |

|                                  |    |           |            |           |       |           |            |       |           |           |        |
|----------------------------------|----|-----------|------------|-----------|-------|-----------|------------|-------|-----------|-----------|--------|
| Median (IQR)                     |    | 9 (3, 12) | 12 (7, 16) | 8 (3, 11) |       | 7 (3, 11) | 10 (8, 12) |       | 7 (3, 12) | 9 (4, 12) |        |
| Local recurrence                 | 65 | 65        | 19 (29%)   | 3 (23%)   | 0.740 | 10 (23%)  | 9 (41%)    | 0.139 | 5 (17%)   | 14 (40%)  | 0.039  |
| Regional recurrence              | 65 | 65        | 6 (9.2%)   | 3 (23%)   | 0.089 | 5 (12%)   | 1 (4.5%)   | 0.655 | 3 (10%)   | 3 (8.6%)  | >0.999 |
| Distant recurrence               | 65 | 65        | 2 (3.1%)   | 1 (7.7%)  | 0.362 | 2 (4.7%)  | 0 (0%)     | 0.545 | 1 (3.3%)  | 1 (2.9%)  | >0.999 |
| DFS outcome                      | 65 |           |            |           | 0.039 |           |            |       |           |           |        |
| Alive and without recurrence     |    | 26 (40%)  | 2 (15%)    | 24 (46%)  |       | 16 (37%)  | 10 (45%)   |       | 11 (37%)  | 15 (43%)  |        |
| Death                            |    | 5 (7.7%)  | 1 (7.7%)   | 4 (7.7%)  |       | 4 (9.3%)  | 1 (4.5%)   |       | 4 (13%)   | 1 (2.9%)  |        |
| Death OSCC                       |    | 11 (17%)  | 4 (31%)    | 7 (13%)   |       | 9 (21%)   | 2 (9.1%)   |       | 7 (23%)   | 4 (11%)   |        |
| Local recurrence                 |    | 18 (28%)  | 3 (23%)    | 15 (29%)  |       | 10 (23%)  | 8 (36%)    |       | 5 (17%)   | 13 (37%)  |        |
| Regional or Nodal recurrence     |    | 5 (7.7%)  | 3 (23%)    | 2 (3.8%)  |       | 4 (9.3%)  | 1 (4.5%)   |       | 3 (10%)   | 2 (5.7%)  |        |
| DFS event                        | 65 | 34 (52%)  | 10 (77%)   | 24 (46%)  | 0.047 | 23 (53%)  | 11 (50%)   | 0.790 | 15 (50%)  | 19 (54%)  | 0.730  |
| DSS outcome                      | 65 |           |            |           | 0.009 |           |            | 0.404 |           |           | 0.148  |
| Alive with or without recurrence |    | 33 (51%)  | 2 (15%)    | 31 (60%)  |       | 19 (44%)  | 14 (64%)   |       | 12 (40%)  | 21 (60%)  |        |
| Death                            |    | 5 (7.7%)  | 1 (7.7%)   | 4 (7.7%)  |       | 4 (9.3%)  | 1 (4.5%)   |       | 4 (13%)   | 1 (2.9%)  |        |
| Death OSCC                       |    | 27 (42%)  | 10 (77%)   | 17 (33%)  |       | 20 (47%)  | 7 (32%)    |       | 14 (47%)  | 13 (37%)  |        |
| DSS event                        | 65 | 34 (52%)  | 10 (77%)   | 24 (46%)  | 0.004 | 20 (47%)  | 7 (32%)    | 0.255 | 14 (47%)  | 13 (37%)  |        |
| OS Outcome                       | 65 |           |            |           | 0.004 |           |            | 0.138 |           |           | 0.108  |
| Alive with or without recurrence |    | 33 (51%)  | 2 (15%)    | 31 (60%)  |       | 19 (44%)  | 14 (64%)   |       | 12 (40%)  | 21 (60%)  |        |
| Death by any cause               |    | 32 (49%)  | 11 (85%)   | 21 (40%)  |       | 24 (56%)  | 8 (36%)    |       | 18 (60%)  | 14 (40%)  |        |
| Overall Survival event           | 65 | 32 (49%)  | 11 (85%)   | 21 (40%)  | 0.004 | 24 (56%)  | 8 (36%)    | 0.138 | 18 (60%)  | 14 (40%)  | 0.108  |

1 Wilcoxon rank sum test; Pearson's Chi-squared test; Fisher's exact test

Abbreviations: DFS: Disease-free survival, DSS: Disease-specific survival, MD: Moderately differentiated, OSCC: Oral squamous cell carcinoma, OS: Overall survival PD: Poorly differentiated, SD: standard deviation, WD: Well differentiated, WPOI: worst pattern of invasion.

Supplementary Table S4. Univariate analysis of clinical and histopathological variables for the different survival rates (OS, DSS, DFS)

|                                             | Cox proportional Hazard Model |         |                   |         |                   |         |
|---------------------------------------------|-------------------------------|---------|-------------------|---------|-------------------|---------|
|                                             | OS: HR(CI95%)                 | p-value | DSS: HR(CI95%)    | p-value | DFS: HR(CI95%)    | p-value |
| <b>Age at diagnosis</b>                     |                               |         |                   |         |                   |         |
|                                             | Ref.Cat.                      | -       | Ref.Cat.          | -       | Ref.Cat.          | -       |
| NA                                          | 1.02 (0.99-1.05)              | 0.107   | 1.01 (0.98-1.04)  | 0.373   | 1.02 (0.99-1.04)  | 0.177   |
| <b>Gender</b>                               |                               |         |                   |         |                   |         |
|                                             | Ref.Cat.                      | -       | Ref.Cat.          | -       | Ref.Cat.          | -       |
| Men                                         |                               |         |                   |         |                   |         |
| Women                                       | 0.35 (0.15-0.82)              | 0.015   | 0.36 (0.14-0.89)  | 0.028   | 0.80 (0.40-1.63)  | 0.549   |
| <b>Tobacco use</b>                          |                               |         |                   |         |                   |         |
|                                             | Ref.Cat.                      | -       | Ref.Cat.          | -       | Ref.Cat.          | -       |
| Never smoker                                |                               |         |                   |         |                   |         |
| Former smoker                               | 1.50 (0.59-3.84)              | 0.395   | 1.96 (0.73-5.31)  | 0.184   | 1.40 (0.62-3.19)  | 0.418   |
| Current smoker                              | 2.11 (0.90-4.90)              | 0.084   | 2.47 (0.97-6.27)  | 0.056   | 1.14 (0.50-2.59)  | 0.757   |
| <b>Alcohol use</b>                          |                               |         |                   |         |                   |         |
|                                             | Ref.Cat.                      | -       | Ref.Cat.          | -       | Ref.Cat.          | -       |
| Nondrinker                                  |                               |         |                   |         |                   |         |
| Former drinker                              | 1.73 (0.64-4.68)              | 0.280   | 2.07 (0.75-5.73)  | 0.162   | 1.78 (0.72-4.44)  | 0.211   |
| Current drinker                             | 1.28 (0.51-3.25)              | 0.596   | 1.25 (0.45-3.45)  | 0.667   | 1.13 (0.46-2.83)  | 0.787   |
| <b>Tumor location</b>                       |                               |         |                   |         |                   |         |
|                                             | Ref.Cat.                      | -       | Ref.Cat.          | -       | Ref.Cat.          | -       |
| Tongue                                      |                               |         |                   |         |                   |         |
| Base of the Mouth                           | 0.87 (0.36-2.05)              | 0.741   | 0.92 (0.36-2.35)  | 0.857   | 0.67 (0.29-1.57)  | 0.358   |
| Tongue and Base of the Mouth                | 1.16 (0.34-3.93)              | 0.810   | 1.39 (0.40-4.78)  | 0.603   | 1.61 (0.55-4.68)  | 0.384   |
| <b>Tumor status</b>                         |                               |         |                   |         |                   |         |
|                                             | Ref.Cat.                      | -       | Ref.Cat.          | -       | Ref.Cat.          | -       |
| T1                                          |                               |         |                   |         |                   |         |
| T2                                          | 1.46 (0.47-4.54)              | 0.516   | 1.43 (0.38-5.31)  | 0.596   | 1.06 (0.40-2.83)  | 0.912   |
| T3                                          | 2.16 (0.63-7.41)              | 0.222   | 2.43 (0.60-9.76)  | 0.211   | 1.04 (0.34-3.23)  | 0.944   |
| T4                                          | 2.29 (0.69-7.65)              | 0.177   | 3.00 (0.79-11.38) | 0.107   | 2.21 (0.80-6.10)  | 0.124   |
| <b>Nodal Status</b>                         |                               |         |                   |         |                   |         |
|                                             | Ref.Cat.                      | -       | Ref.Cat.          | -       | Ref.Cat.          | -       |
| N0                                          |                               |         |                   |         |                   |         |
| N1                                          | 1.21 (0.40-3.67)              | 0.741   | 1.07 (0.30-3.84)  | 0.912   | 1.57 (0.57-4.31)  | 0.384   |
| N2/N3                                       | 1.04 (0.45-2.40)              | 0.920   | 1.12 (0.46-2.76)  | 0.795   | 0.88 (0.40-1.98)  | 0.764   |
| <b>Metastasis status</b>                    |                               |         |                   |         |                   |         |
|                                             | Ref.Cat.                      | -       | Ref.Cat.          | -       | Ref.Cat.          | -       |
| M0                                          |                               |         |                   |         |                   |         |
| M1                                          | 5.84 (2.18-15.64)             | 0.000   | 6.00 (2.02-17.81) | 0.001   | 3.11 (1.15-8.44)  | 0.026   |
| <b>Histological Grade</b>                   |                               |         |                   |         |                   |         |
|                                             | Ref.Cat.                      | -       | Ref.Cat.          | -       | Ref.Cat.          | -       |
| Grade 1: WD                                 |                               |         |                   |         |                   |         |
| Grade 2: MD                                 | 1.26 (0.54-2.95)              | 0.596   | 1.77 (0.64-4.92)  | 0.276   | 1.63 (0.72-3.71)  | 0.242   |
| Grade 3: PD                                 | 5.07 (1.73-14.84)             | 0.003   | 8.09 (2.43-26.97) | 0.001   | 5.15 (1.75-15.15) | 0.003   |
| <b>Stage</b>                                |                               |         |                   |         |                   |         |
|                                             | Ref.Cat.                      | -       | Ref.Cat.          | -       | Ref.Cat.          | -       |
| Stage I                                     |                               |         |                   |         |                   |         |
| Stage II                                    | 1.43 (0.28-7.39)              | 0.674   | 2.75 (0.32-23.63) | 0.358   | 1.41 (0.36-5.48)  | 0.617   |
| Stage III                                   | 2.24 (0.52-9.74)              | 0.280   | 3.88 (0.51-29.46) | 0.190   | 1.56 (0.46-5.36)  | 0.478   |
| Stage IV                                    | 1.71 (0.35-8.29)              | 0.503   | 2.39 (0.28-20.48) | 0.430   | 1.32 (0.34-5.12)  | 0.689   |
| <b>Oral potentially malignant disorders</b> |                               |         |                   |         |                   |         |
|                                             | Ref.Cat.                      | -       | Ref.Cat.          | -       | Ref.Cat.          | -       |
| No                                          |                               |         |                   |         |                   |         |
| Yes                                         | 0.81 (0.28-2.32)              | 0.697   | 0.46 (0.11-1.94)  | 0.289   | 0.74 (0.26-2.10)  | 0.569   |
| <b>Perineural invasion</b>                  |                               |         |                   |         |                   |         |
|                                             | Ref.Cat.                      | -       | Ref.Cat.          | -       | Ref.Cat.          | -       |
| No                                          |                               |         |                   |         |                   |         |
| Yes                                         | 1.21 (0.58-2.51)              | 0.610   | 1.25 (0.56-2.79)  | 0.575   | 1.04 (0.52-2.08)  | 0.912   |
| <b>Vascular invasion</b>                    |                               |         |                   |         |                   |         |
|                                             | Ref.Cat.                      | -       | Ref.Cat.          | -       | Ref.Cat.          | -       |
| No                                          |                               |         |                   |         |                   |         |
| Yes                                         | 0.68 (0.16-2.95)              | 0.610   | 0.81 (0.18-3.59)  | 0.787   | 0.59 (0.14-2.53)  | 0.478   |
| <b>Lymphoplasmacytic invasion</b>           |                               |         |                   |         |                   |         |
|                                             | Ref.Cat.                      | -       | Ref.Cat.          | -       | Ref.Cat.          | -       |
| Nil/Low                                     |                               |         |                   |         |                   |         |
| Moderate                                    | 0.86 (0.40-1.89)              | 0.711   | 0.67 (0.28-1.64)  | 0.384   | 0.90 (0.43-1.88)  | 0.779   |
| Intense                                     | 1.04 (0.24-4.61)              | 0.952   | 1.16 (0.26-5.19)  | 0.841   | 0.73 (0.17-3.15)  | 0.674   |
| <b>Margins affected</b>                     |                               |         |                   |         |                   |         |
|                                             | Ref.Cat.                      | -       | Ref.Cat.          | -       | Ref.Cat.          | -       |
| No                                          |                               |         |                   |         |                   |         |
| Yes                                         | 0.50 (0.07-3.71)              | 0.503   | 0.61 (0.08-4.53)  | 0.631   | 0.44 (0.06-3.22)  | 0.418   |
| <b>Risk Score</b>                           |                               |         |                   |         |                   |         |
|                                             | Ref.Cat.                      | -       | Ref.Cat.          | -       | Ref.Cat.          | -       |
| 0-1                                         |                               |         |                   |         |                   |         |
| 2-3                                         | 0.92 (0.36-2.37)              | 0.865   | 1.02 (0.37-2.86)  | 0.968   | 1.02 (0.43-2.41)  | 0.968   |
| 4-7                                         | 1.26 (0.54-2.94)              | 0.582   | 1.35 (0.53-3.41)  | 0.529   | 1.17 (0.52-2.63)  | 0.704   |
| <b>WPOI 1+2+3 VS 4+5</b>                    |                               |         |                   |         |                   |         |
|                                             | Ref.Cat.                      | -       | Ref.Cat.          | -       | Ref.Cat.          | -       |
| WPOI 1+2+3                                  |                               |         |                   |         |                   |         |
| WPOI 4+5                                    | 2.34 (1.00-5.47)              | 0.050   | 1.92 (0.72-5.12)  | 0.194   | 1.76 (0.72-4.28)  | 0.211   |
| <b>Depth of Invasion</b>                    |                               |         |                   |         |                   |         |
|                                             | Ref.Cat.                      | -       | Ref.Cat.          | -       | Ref.Cat.          | -       |
| Less invasive                               |                               |         |                   |         |                   |         |
| Moderate invasive                           | 0.93 (0.39-2.23)              | 0.873   | 0.89 (0.34-2.36)  | 0.818   | 1.07 (0.48-2.42)  | 0.865   |

Deeply invasive                    0.64 (0.26-1.57)    0.332    0.69 (0.26-1.81)    0.453    0.51 (0.21-1.20)    0.124
